# Supplementary material
Source: Springer Nature journal article supplement (https://www.springermedizin.de/resource/supplementary/13053_2014_471_MOESM2_ESM.pdf/9673892)

**A**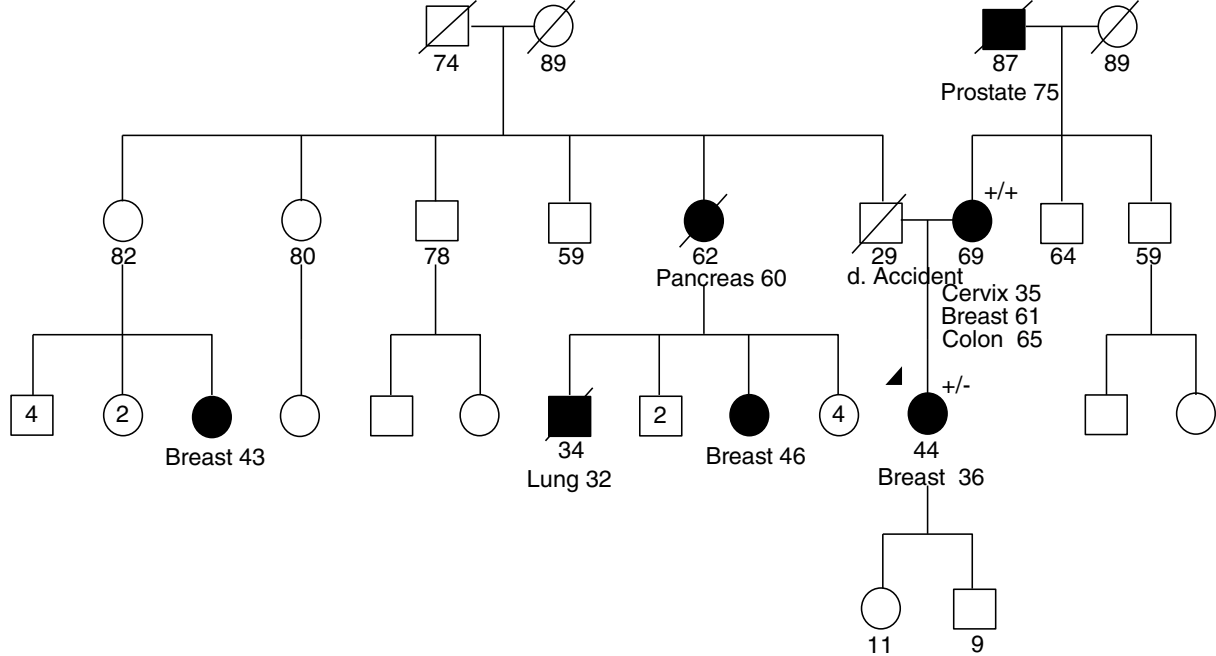**B**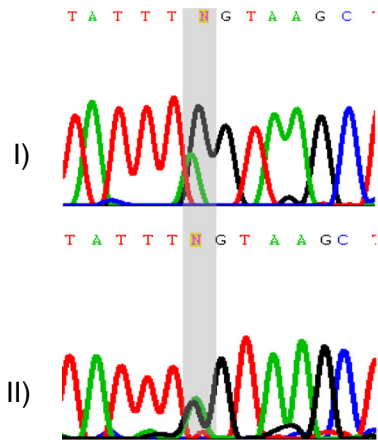**C**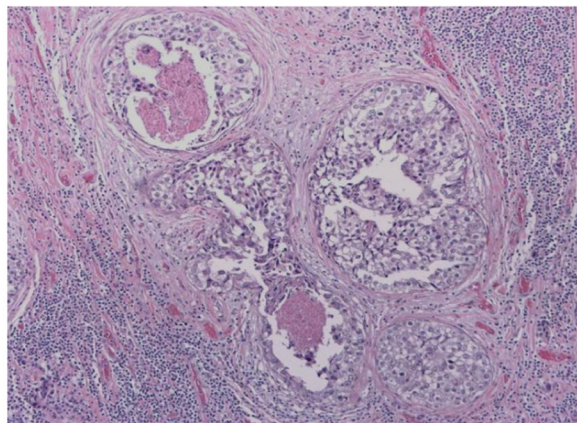

Supplement: MOESM2 [file 9673892]
